# Supplementary material
Source: PubMed Central journal article supplement (PMC7126031)
Supplement: rspb20192988supp2.pdf [file rspb20192988supp2.pdf]



# Crane Maintenance

for Whooping and Sandhill Cranes

Zeigler® Crane Diets are formulated as completely balanced diets for cranes (Whooping and Sandhill Cranes). These diets supply all needed nutrients as identified by leading avian nutritionists. In addition, the formulas are standardized to contain fixed quantities of the highest quality raw ingredients. Fed at National Zoological Parks and USDI Patuxent Wildlife Research Center. Crane Maintenance diet is for cranes that are growing. It also fed before and after the breeding season.

## Feeding Suggestions

Crane Maintenance should be fed free choice as the total diet; no supplementation is necessary for normal healthy birds. If the birds go off feed, feeding small fish for a few days would help. As a guide, most birds will consume the equivalent of one-fifth of their body weight per day. However, feeding requirements will vary depending on species, environment, level of activity and stress factors. Fresh water should be available at all times.

## Packaging

40 lb. box, (2-20 lb. nitrogen preserved bags)

## Particle Size

3/16" Pellet, 1/4" long

## Guaranteed Analysis

|               |         |       |
|---------------|---------|-------|
| Crude Protein | Minimum | 15.0% |
| Crude Fat     | Minimum | 3.5%  |
| Crude Fiber   | Maximum | 4.0%  |
| Ash           | Maximum | 7.0%  |

## Calculated Nutrient Composition

Please contact us for further information.

## Ingredients

Corn, Wheat Middlings, Oats, Fish Meal, Dehulled Soybean Meal, Dehydrated Alfalfa Meal, Grain Distillers Dried Yeast, Dried Whey, Dicalcium Phosphate, Limestone Ground, Calcium Propionate (Preservative), Corn Distillers Dried Grains with Solubles, Inositol, dl-Alpha Tocopheryl Acetate (Vitamin E Supplement), Niacin, Ethoxyquin (Preservative), Paramino Benzoic Acid, d-Calcium Pantothenate, Biotin, Vitamin A Acetate, Riboflavin-5-Phosphate, Menadione Sodium Bisulfite Complex (source of Vitamin K Activity), Vitamin B12 Supplement, Thiamine Mononitrate, Pyridoxine Hydrochloride, Folic Acid, Vitamin D3 Supplement, Salt, Manganese Sulfate, Zinc Sulfate, Ferrous Sulfate, Copper Sulfate, Sodium Molybdate, Cobalt Carbonate, Sodium Selenite, Choline Chloride, Xanthophyll, dl- Methionine, Canthaxanthin.

0504 04/17 75340000
